# Supplementary material for: BiFCROS: A Low-Background Fluorescence Repressor Operator System for Labeling of Genomic Loci
Source: PubMed Central journal article supplement (PMC5473772; doi:10.1534/g3.117.040782), 2017-04-25
Supplement: 1969FileS1.pdf [file 1969FileS1.pdf]

Supporting information

AB-glucose

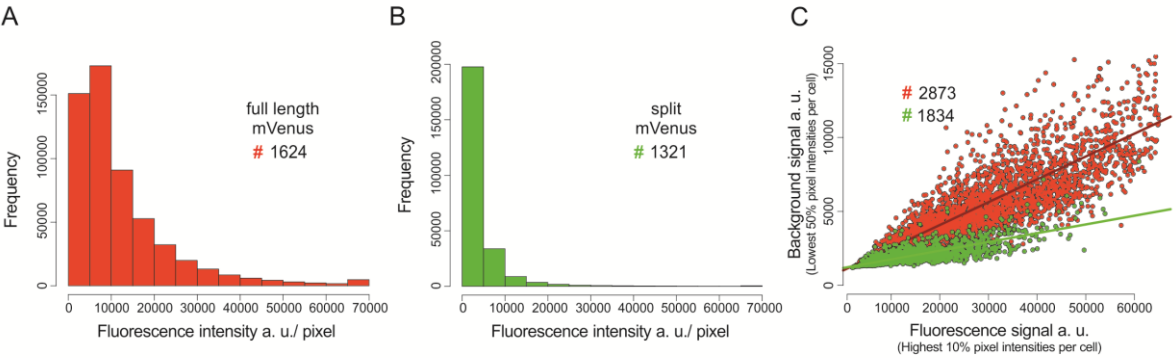

AB-sodium acetate

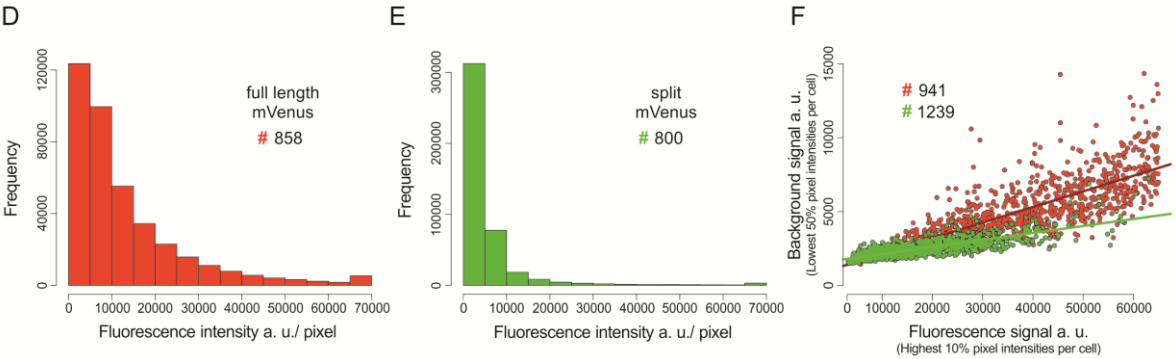

Figure S1: Biological replicate of data shown in figure 5 of the main article (compare respective figure legend).

**Table S1: Strains used in this study.**

| Strain                       | Relevant genotype and additional characteristics                                                                     | Resistance                             | Reference                   |
|------------------------------|----------------------------------------------------------------------------------------------------------------------|----------------------------------------|-----------------------------|
| <i>E. coli</i> XL1-Blue      | <i>recA1 endA1 gyrA96 thi-1 hsdR17 supE44 relA1 lac[F proAB lacIqZΔM15 Tn10 (TetR)]</i>                              | tetracycline, nalidixic acid           | Stratagene                  |
| <i>E. coli</i> D50           | BW25113 + pKD46                                                                                                      | ampicillin                             | (Datsenko and Wanner, 2000) |
| <i>E. coli</i> MG1655        | Wild type                                                                                                            | -                                      | (Blattner et al., 1997)     |
| <i>S. cerevisiae</i> PJ69-4a | MATa, <i>trp1-901, leu2-3, leu2-112, ura3-52, his3-200, gal4Δ, gal80Δ, GAL2-ADE2, LYS2::GAL1HIS3, met2::GAL7-lac</i> |                                        | (James et al., 1996)        |
| SM29                         | MG1655, <i>tnaA(74-1319)::OL1/UAS hybrid</i> FROS array, <i>kan<sup>R</sup></i>                                      | kanamycin                              | This study                  |
| SM57                         | MG1655 + pMA270                                                                                                      | ampicillin                             | This study                  |
| SM65                         | SM29 + pMA270                                                                                                        | kanamycin, ampicillin                  | This study                  |
| SM68                         | MG1655 + pMA165 + pMA270                                                                                             | kanamycin, ampicillin                  | This study                  |
| SM69                         | MG1655 + pMA275                                                                                                      | ampicillin                             | This study                  |
| SM70                         | MG1655 + pMA276                                                                                                      | ampicillin                             | This study                  |
| SM77                         | SM29 + pMA275                                                                                                        | kanamycin, ampicillin                  | This study                  |
| SM126                        | MG1655 + pWM2060                                                                                                     | ampicillin                             | This study                  |
| SM153                        | SM29 + pMA301 + pMA270                                                                                               | kanamycin, chloramphenicol, ampicillin | This study                  |
| SM158                        | SM29 + pMA310 + pMA270                                                                                               | kanamycin, chloramphenicol, ampicillin | This study                  |

**Table S2: Replicons used in this study.**

| Plasmid           | Characteristics                                                              | Resistance                     | Reference                                  |
|-------------------|------------------------------------------------------------------------------|--------------------------------|--------------------------------------------|
| pKD46             | <i>bla, ara, oriR101, rep101<sup>ts</sup></i>                                | ampicillin                     | (Datsenko and Wanner, 2000)                |
| pUC57-kan         | Cloning vector                                                               | kanamycin                      | GenScript, Piscataway Township, NJ, USA    |
| pUC19             | Cloning vector                                                               | ampicillin                     | Anke Becker                                |
| pPS19             | <i>pDS132, P<sub>BAD</sub> lacI-eyfp λcl-ecfp P<sub>CP18</sub> araE tetR</i> | chloramphenicol, spectinomycin | Dhruba Chatteraj (Srivastava et al., 2006) |
| pGBKT7            | <i>E. coli / S. cerevisiae</i> Shuttle Y2H vector                            | kanamycin                      | Clontech                                   |
| pBad24-LacI-venus | <i>venus</i> fluorophor                                                      | ampicillin                     | (Hammar et al., 2014)                      |
| synVicII-0.1      | <i>oriR6K, 2μ ori, URA-3</i>                                                 | ampicillin                     | (Messerschmidt et al., 2015)               |
| synVicII-1.3      | synVicII-1.0 P <sub>A1/04/03<sup>-</sup></sub> RBSII- <i>gfp</i> (AAV)       | ampicillin                     | (Messerschmidt et al., 2015)               |
| pWM2060           | pTrc99A , promoter                                                           | ampicillin                     | Provided by W.                             |

|        |                                                                                                               |                 |                                 |
|--------|---------------------------------------------------------------------------------------------------------------|-----------------|---------------------------------|
|        | down mutations in -35 and -10                                                                                 |                 | Margolin (Bernard et al., 2007) |
| pMA164 | pUC57 kan + OL1/UAS hybrid FROS array                                                                         | kanamycin       | This study                      |
| pMA165 | pMA164 + tnaA-OL1/UAS hybrid FROS array-tnaA                                                                  | kanamycin       | This study                      |
| pMA182 | synVicII-1.3, amp::cat                                                                                        | chloramphenicol | This study                      |
| pMA252 | pMA164, <i>ColE1::oriR6K</i>                                                                                  | kanamycin       | This study                      |
| pMA270 | pWM2060 with $\lambda$ cl fused to N-terminal fragment of mVenus, Gal4 fused to C-terminal fragment of mVenus | ampicillin      | This study                      |
| pMA275 | pWM2060, $\lambda$ cl fused to full length mVenus                                                             | ampicillin      | This study                      |
| pMA276 | pWM2060, Gal4 fused to full length mVenus                                                                     | ampicillin      | This study                      |
| pMA301 | pMA182, <i>gfp::OL1/UAS</i> hybrid FROS array                                                                 | chloramphenicol | This study                      |
| pMA310 | pMA182 $\Delta$ <i>gfp</i>                                                                                    | chloramphenicol | This study                      |

**Table S3: Oligonucleotides used in this study.**

| Name | Sequence                                                                            |
|------|-------------------------------------------------------------------------------------|
| 46   | GTCTATCTGACCGCCGACAAGCAGAAGAAC                                                      |
| 47   | GTTCTTCTGCTTGTCTGGCGGTCTCAGATAGAC                                                   |
| 95   | ACGCCAAGCTTGCATGCAGGCCTCTGCAGTCGACGGGCCCGGGAC CGGCAAGATCAACAGGTA                    |
| 96   | TCATGAGATTATCAAAAAGGATCTTACCTAGATCCTTTTCCCGGGTAGCCATCACCAGAGCCAAA                   |
| 97   | GGTTAATTGGTTGTAACATTATTCAGATTGGGCTTGATTTCGCGAGTGGTACGTTTTACT                        |
| 98   | CAGTCATACCACTGGCGGGAGACCTCTAGATATCGGATCCACATGTGAAAGAGAACGCGG                        |
| 102  | GCGAGGATAAGTGCATTATG                                                                |
| 103  | ACAATAACCCGGAATGAAGC                                                                |
| 257  | AATTCGAAGACCTGGCGGTGATANNGNNCNNNCGGAGTACTGTCCTCCGNNCNNNGNNNTAC<br>CACTGGCGGGAGACCT  |
| 258  | CTAGAGGTCTCCCGCCAGTGGTANNNCNNNGNNCGGAGGACAGTACTCCGNNNGNNCNNNTAT<br>CACCGCCAGGTCTTCG |
| 267  | ACAGCTCCTCGCCCTTGCTCACCATGGTGCATGCTGCGGCCAAACGTCTCTTCAGGCC                          |
| 268  | CGCAGCATTGCGACCATGGTGTAGCAAGGGCGAGGAGCTGTTTAC                                       |
| 270  | CAACTACAACAGCCACAACGTCTATCTGACCGCCTAACCTAGCAGGAGGAATTCACCATGAAGCT<br>ACTGTCTTCTATC  |
| 389  | GTATGTTTGCTTTACCTGTTGATCTTGCCGGTCCCGGGAACCTGTTGATAGTACGTACTAAGC                     |
| 390  | GAATCTAATCGGTTTGGCTCTGGTGTGATGGTACCCGGGCCATGTCAGCCGTTAAGTGTCC                       |
| 409  | CTACAACAGGGCAAAGCGCAAC                                                              |
| 410  | CAAATCAAGGGCGGTGATCGAC                                                              |
| 646  | ATGGAATTCGAGCTCGGTACCCGCTTCTAGCAGGAAACAGCTATG                                       |
| 655  | TATATGAGTAACTTGGTCTGACAGTCATCGCAGTACTGTTGTATTCATT                                   |
| 656  | CTGCAGGTGCACTCTAGAGGATCCCCTTACTTGTACAGCTCGTCCATGCC                                  |
| 657  | CCTGACTCAGTGCTTTCTATCCCCTTTTGGCGAAAATGAGACG                                         |

|      |                                                                  |
|------|------------------------------------------------------------------|
| 712  | GGTGAAAACCTCTGACACATGCAGCTTTACTTGTACAGCTCGTCCATGCCGAGA           |
| 714  | GTGAGCAAGGGCGAGGAGCTGTTC                                         |
| 757  | GACAAGCAGAAGAACGGCATCAAG                                         |
| 758  | TTGATGCCGTTCTTCTGCTTGTCCGATACAGTCAACTGTCTTTG                     |
| 769  | GTTTCGATAGAAGACAGTAGCTTCATGGTGAATTCCTCCTGCTAGG                   |
| 809  | ATGGAATTCGAGCTCGGTACCCGCGTTCTAGCAGGAAACAGCTATGAAGCTACTGTCTTCTATC |
| 1045 | GTGAGTTTTTCGTTCCACTAGGGATAACAGGGTAATGGGATCCGATATCTAGAGGTC        |
| 1046 | GTACGTACTATCAACAGGTTCCAAGCTAGCGTTGAAAACGACGGCCAG                 |
| 1259 | TTTTTCGTTCCACTAGGGATAACAGGGTAATCCAAGCTAGC                        |
| 1260 | GTAATCAACAGGTTCCAAGCTAGCTTGATTACCCTGT                            |

**Table S4: Primer and templates used for construction of fusion proteins.**

|                                                    | <b><math>\lambda</math>cl</b> | <b>Gal4</b>           | <b>Full length mVenus</b> | <b>N-terminal fragment mVenus</b> | <b>C-terminal fragment mVenus</b> | <b>Acceptor vector</b>  |
|----------------------------------------------------|-------------------------------|-----------------------|---------------------------|-----------------------------------|-----------------------------------|-------------------------|
| <b>pMA275 (<math>\lambda</math>cl-mVenus)</b>      | 646 + 656<br>(pPS19)          | -                     | -                         | 268 + 47<br>(pBad24-Lacl-venus)   | 46 + 656<br>(pBad24-Lacl-venus)   | pWM2060<br><i>Sma</i> I |
| <b>pMA276 (Gal4-mVenus)</b>                        | -                             | 809 + 712<br>(pGBKT7) | 714 + 656<br>(pMA275)     | -                                 | -                                 | pWM2060<br><i>Sma</i> I |
| <b>pMA270 <math>\lambda</math>cl-VN + Gal4-VC)</b> | 646 + 267<br>(pPS19)          | 270 + 758<br>(pGBKT7) | -                         | 268 + 769<br>(pBad24-Lacl-venus)  | 757 + 656<br>(pMA275)             | pWM2060<br><i>Sma</i> I |
